# Supplementary material for: Hydroxylated Graphene: A Promising Reinforcing Nanofiller for Nanoengineered Cement Composites
Source: PubMed Central journal article supplement — ACS Omega. 2021 Nov 1;6(45):30465–77. doi: 10.1021/acsomega.1c03844 (PMC8600514; doi:10.1021/acsomega.1c03844), 2021-11-01
Supplement: ao1c03844_si_001.pdf [file ao1c03844_si_001.pdf]

# Supporting Information

## Hydroxylated-graphene: a promising reinforcing nanofiller for nano-engineering cement composites

Sen Yang, Wen Jia, Yuanguai Wang, Weifu Zhang, Xiaoya Yuan\*

*College of Materials Science and Engineering, Chongqing Jiaotong University,*

*Chongqing 400074, China.*

Corresponding Author: Xiaoya Yuan (Email): [yuanxy@cqjtu.edu.cn](mailto:yuanxy@cqjtu.edu.cn).

### 1. Figures

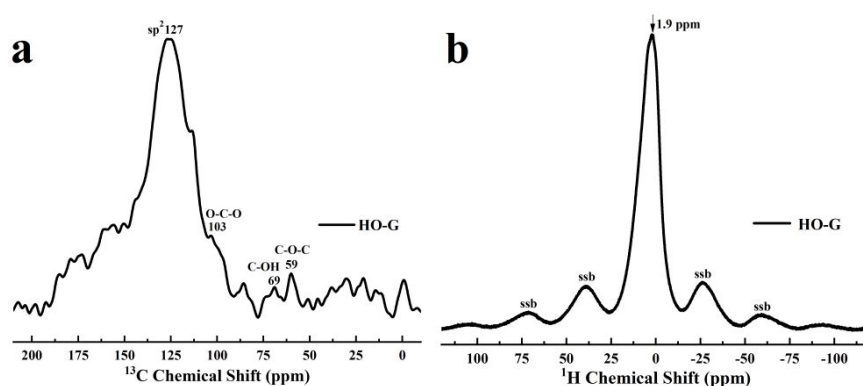

**Figure S1.** (a)  $^{13}\text{C}$  NMR and (b)  $^1\text{H}$  NMR spectra of HO-G. “ssb” denotes spinning sidebands.

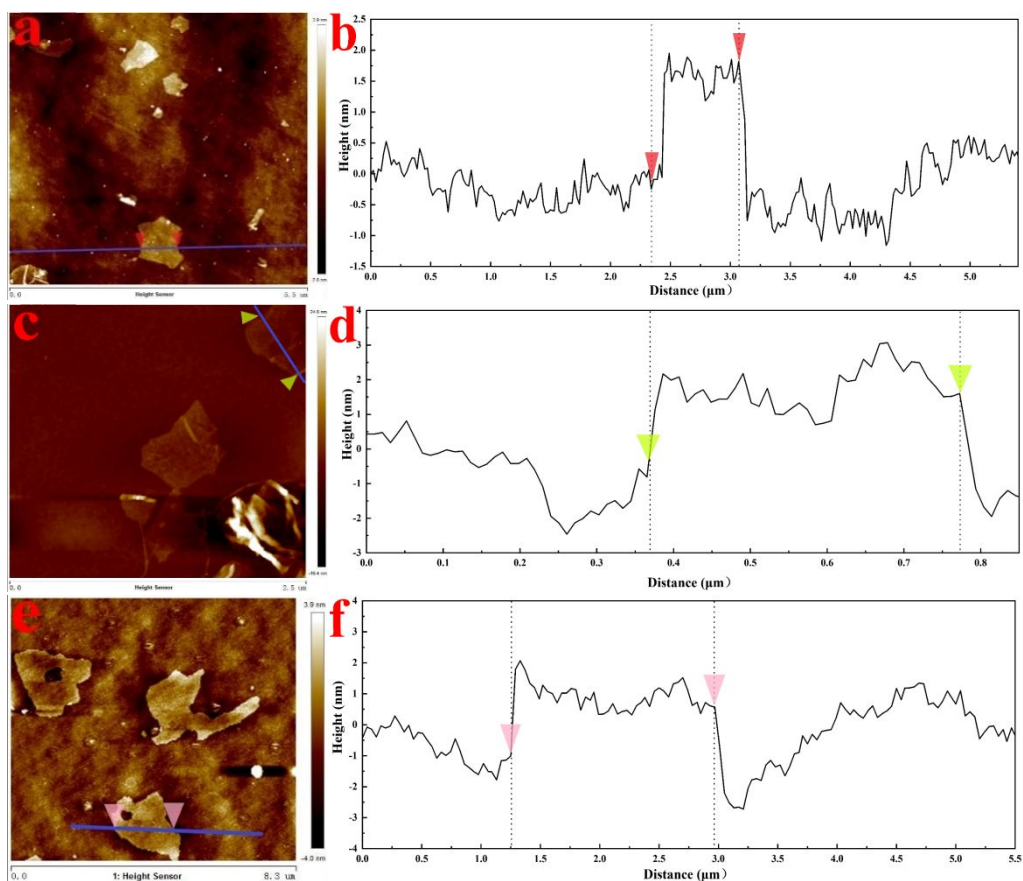

**Figure S2.** Typical AFM images and the corresponding height profiles of GO(a, b), TRGO(c, d), HO-G(e, f).

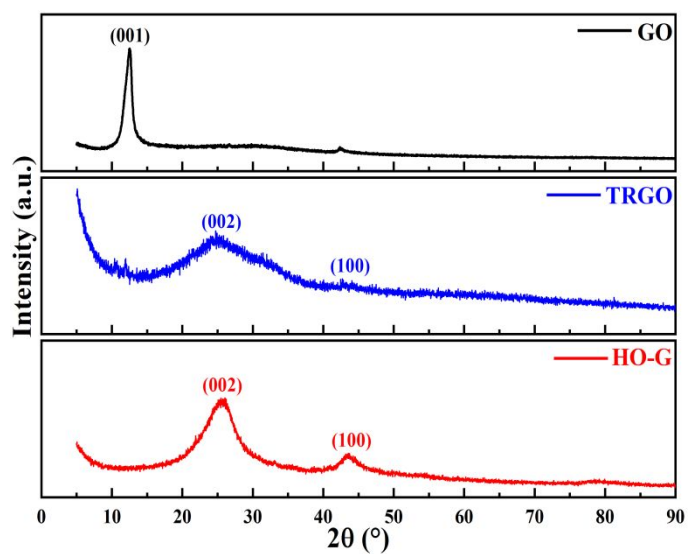

**Figure S3.** XRD patterns of GO, TTGO and HO-G.

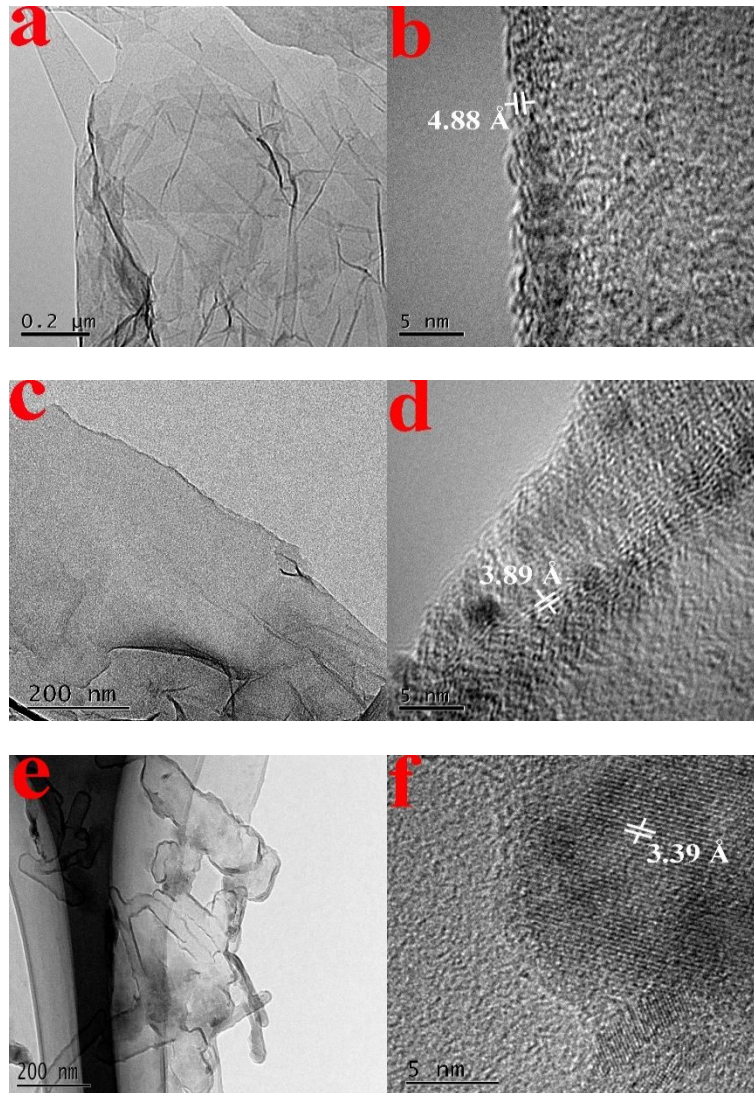

**Figure S4.** HRTEM images of GO(a, b), TRGO(c, d) and HO-G(e, f).

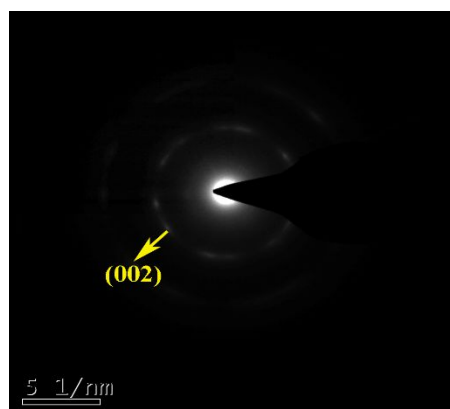

**Figure S5.** SAED image of HO-G.

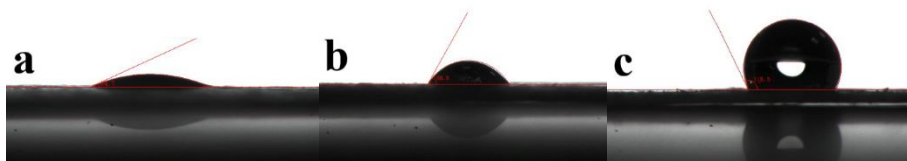

**Figure S6.** The contact angles of (a) GO, (b) HO-G and (c) TRGO.

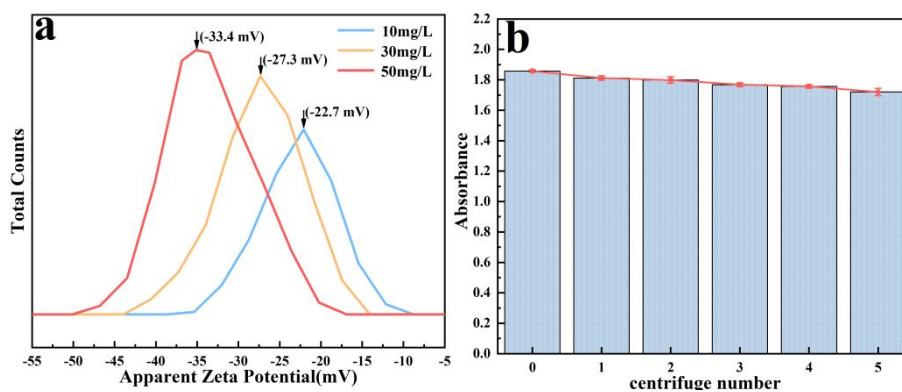

**Figure S7.** (a) Zeta potentials of aqueous HO-G solutions of different concentrations.

(b) The change of absorbance of aqueous HO-G solution (30 mg/L) vs centrifuge number.

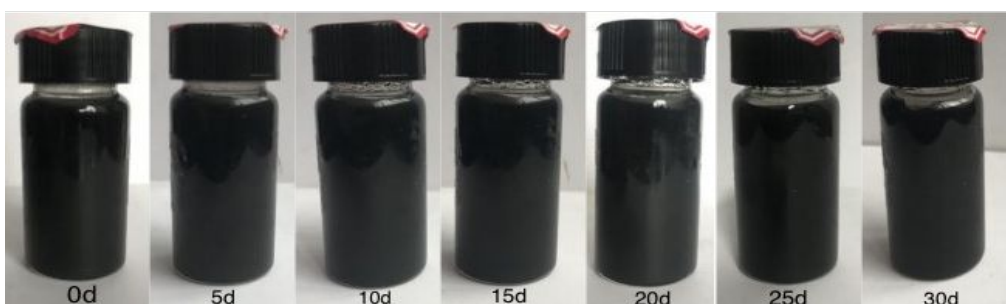

**Figure S8.** Digital photographs of aqueous HO-G solutions (30 mg/L) with different standing times.

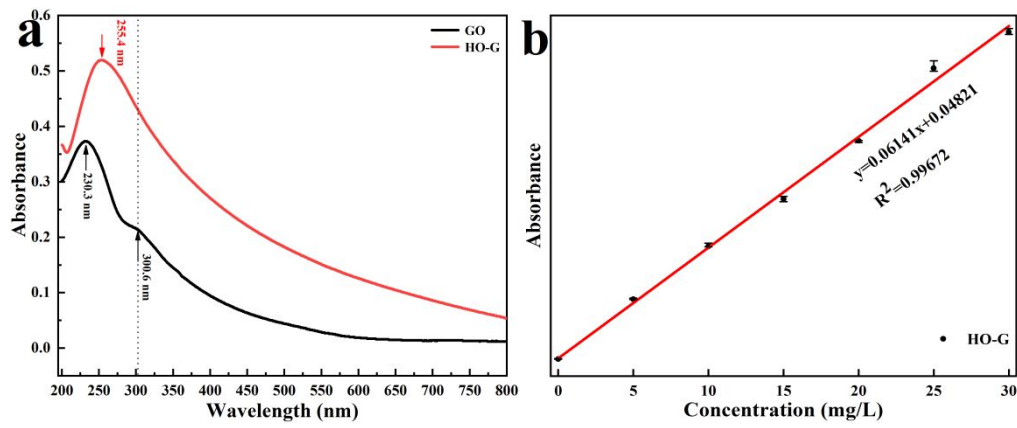

**Figure S9.** (a) UV-vis spectra of aqueous GO and HO-G solution. (b) The plots of absorbance of aqueous HO-G solutions with different concentrations.

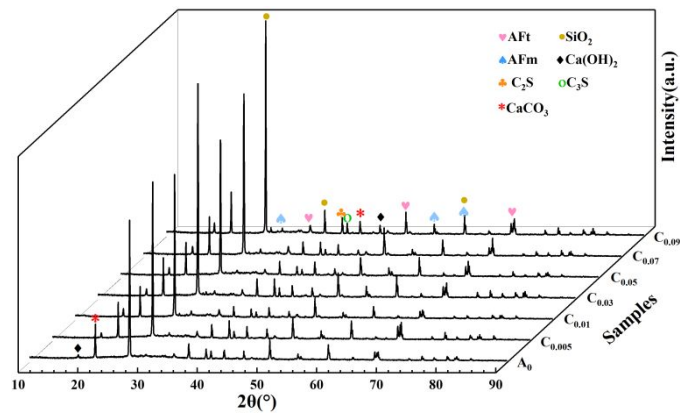

**Figure S10.** XRD patterns of HO-G blended cement mortars nanocomposites cured at 28 days.

## 2. Tables

**Table S1.** Comparisons of HO-G against other nanofillers for the enhancement of cement composites.

| Nanofillers                                         | Optimal dosage <sup>a</sup> (%) | Enhancement of the mechanical properties in 28d (%) |                   | References                    |
|-----------------------------------------------------|---------------------------------|-----------------------------------------------------|-------------------|-------------------------------|
|                                                     |                                 | Compressive strength                                | Flexural strength |                               |
| Nano silica (nano-SiO <sub>2</sub> )                | 2                               | 10.1                                                | 11.0              | Shi et al. <sup>1</sup>       |
| Nano-alumina (nano-Al <sub>2</sub> O <sub>3</sub> ) | 1                               | 18.46                                               | 6.27              | Ge et al. <sup>2</sup>        |
| Nano-calcium carbonate (nano-CaCO <sub>3</sub> )    | 2                               | 3.23                                                | 4.68              | Cosentino et al. <sup>3</sup> |
| Nano-titanium oxide (nano-TiO <sub>2</sub> )        | 0.75                            | 19.33                                               | 15.1              | Salman et al. <sup>4</sup>    |
| Carbon nanotubes (CNTs)                             | 0.05                            | 6.4                                                 | 10.1              | Du et al. <sup>5</sup>        |
| Graphene oxide (GO)                                 | 0.03                            | 19.6                                                | 17.54             | This study                    |
| Hydroxylated-graphene (HO-G)                        | 0.03                            | 21.19                                               | 7.89              | This study                    |

a. based on the mass ratio of cement weight.

**Table S2.** Chemical compositions of cement (%).

| Chemical composition           | Test value (%) |
|--------------------------------|----------------|
| Al <sub>2</sub> O <sub>3</sub> | 4.47           |
| SiO <sub>2</sub>               | 21.5           |
| Fe <sub>2</sub> O <sub>3</sub> | 3.37           |
| CaO                            | 65.84          |
| MgO                            | 3.18           |
| SO <sub>3</sub>                | 0.3            |
| NaO                            | 0.49           |
| f-CaO                          | 0.78           |
| C <sub>3</sub> S               | 58.92          |
| C <sub>2</sub> S               | 20.19          |
| C <sub>3</sub> A               | 8.12           |
| C <sub>4</sub> AF              | 8.21           |

**Table S3.** Physical properties of cement.

| properties                                 | Test value |
|--------------------------------------------|------------|
| Fineness (%)                               | 0.6        |
| Density (g/cm <sup>3</sup> )               | 3.15       |
| Specific surface area (m <sup>2</sup> /kg) | 350        |
| Standard Consistency (%)                   | 25.6       |
| Soundness (mm)                             | 0.5        |
| Initial Setting Time (min)                 | 132        |
| Final Setting Time (min)                   | 198        |

**Table S4.** Gradation of standard sand.

| Square mesh size (mm) | Remaining on the sieve (%) |
|-----------------------|----------------------------|
| 2.0                   | 0                          |
| 1.6                   | 7 ± 4                      |
| 1.0                   | 33 ± 4                     |
| 0.5                   | 67 ± 4                     |
| 0.16                  | 87 ± 4                     |
| 0.08                  | 99 ± 1                     |

**Table S5.** Mix proportion of cement mortars.

| Sample             | Cement (g) | Sand(g) | Water (g) | PCE (%) <sup>a</sup> | GO (%) <sup>a</sup> | HO-G(%) <sup>a</sup> |
|--------------------|------------|---------|-----------|----------------------|---------------------|----------------------|
| A <sub>0</sub>     | 450        | 1350    | 164.93    | 0.3                  | 0                   | 0                    |
| B <sub>0.01</sub>  | 450        | 1350    | 164.93    | 0.3                  | 0.01                | 0                    |
| B <sub>0.03</sub>  | 450        | 1350    | 164.93    | 0.3                  | 0.03                | 0                    |
| B <sub>0.05</sub>  | 450        | 1350    | 164.93    | 0.3                  | 0.05                | 0                    |
| B <sub>0.07</sub>  | 450        | 1350    | 164.93    | 0.3                  | 0.07                | 0                    |
| B <sub>0.09</sub>  | 450        | 1350    | 164.93    | 0.3                  | 0.09                | 0                    |
| C <sub>0.005</sub> | 450        | 1350    | 164.93    | 0.3                  | 0                   | 0.005                |
| C <sub>0.01</sub>  | 450        | 1350    | 164.93    | 0.3                  | 0                   | 0.01                 |
| C <sub>0.03</sub>  | 450        | 1350    | 164.93    | 0.3                  | 0                   | 0.03                 |
| C <sub>0.05</sub>  | 450        | 1350    | 164.93    | 0.3                  | 0                   | 0.05                 |
| C <sub>0.07</sub>  | 450        | 1350    | 164.93    | 0.3                  | 0                   | 0.07                 |
| C <sub>0.09</sub>  | 450        | 1350    | 164.93    | 0.3                  | 0                   | 0.09                 |

a. based on the mass ratio of cement weight.

## Reference

- (1) Cheng, Y.; Shi, Z. Experimental Study on Nano-SiO<sub>2</sub> Improving Concrete Durability of Bridge Deck Pavement in Cold Regions. *Adv. Civ. Eng.* **2019**, *2019*, 1-9, DOI: 10.1155/2019/5284913.
- (2) Zhang, A.; Yang, W.; Ge, Y.; Du, Y.; Liu, P. Effects of nano-SiO<sub>2</sub> and nano-Al<sub>2</sub>O<sub>3</sub> on mechanical and durability properties of cement-based materials: A comparative study. *J. Build. Eng.* **2021**, *34*, DOI: 10.1016/j.job.2020.101936.



- (3) Cosentino, I.; Liendo, F.; Arduino, M.; Restuccia, L.; Ferro, G. A. Nano CaCO<sub>3</sub> particles in cement mortars towards developing a circular economy in the cement industry. *Procedia Struct Integrity* **2020**, *26*, 155-165, DOI: 10.1016/j.prostr.2020.06.019.
- (4) Siang Ng, D.; Paul, S. C.; Anggraini, V.; Kong, S. Y.; Qureshi, T. S.; Rodriguez, C. R.; Liu, Q.-f.; Šavija, B., Influence of SiO<sub>2</sub>, TiO<sub>2</sub> and Fe<sub>2</sub>O<sub>3</sub> nanoparticles on the properties of fly ash blended cement mortars. *Constr. Build. Mater.* **2020**, *258*, 119627.1-119627.11, DOI: 10.1016/j.conbuildmat.2020.119627.
- (5) Du, M.; Jing, H.; Gao, Y.; Su, H.; Fang, H. Carbon nanomaterials enhanced cement-based composites: advances and challenges. *Nanotechnol. Rev.* **2020**, *9* (1), 115-135, DOI:10.1515/ntrev-2020-0011.
